# Supplementary material for: Substituent effects on the stabilities of polymeric and small molecule bis-terpyridine complexes
Source: Royal Society of Chemistry journal article supplement (doi:10.1039/c2py20042b), 2012-01-01
Supplement: c2py20042b.pdf [file c2py20042b.pdf]

# Supplementary Information for: Substituent Effects on the Stabilities of Polymeric and Small Molecule *bis*- Terpyridine Complexes

**Ian M. Henderson and Ryan C. Hayward\***

*Department of Polymer Science and Engineering, University of Massachusetts,  
Amherst, Massachusetts 01003*

\*E-mail: rhayward@mail.pse.umass.edu

## **Model Compounds in the Investigation of Secondary Peaks**

To determine whether the unexplained peaks in the NMR spectra of cobalt complexes corresponded to a Co(III) species,  $(\mathbf{4b})_2\text{Co}^{3+}$  was synthesized using a procedure similar to existing methods.<sup>1</sup> The *mono* complex of terpyridine with cobalt was also synthesized and investigated via NMR. For both species, the chemical shifts did not match the secondary peaks in the spectra for the 4'-modified Co(II) complexes. The possibility that impurities give rise to these secondary peaks was also ruled out by repeated recrystallization and NMR investigation of the small-molecule compounds.

**Synthesis of  $(\mathbf{4b})_2\text{Co}^{3+}$ .** A 20 mL vial was charged with 0.1 g of **(4b)**, 0.0024 g  $\text{CoCl}_2 \cdot 6\text{H}_2\text{O}$  and 0.0034 g  $\text{AgNO}_2$ . Deuterium oxide (1 mL) was then added, and the mixture stirred for 1 h. After this time, all particulates were removed via syringe filter and the solution was transferred to an NMR tube.  $^1\text{H}$  NMR ( $\text{D}_2\text{O}$ ):  $\delta = 8.56$  (s, 2H), 8.52(d, 2H), 7.34 (2, 4H), 4.2-3.3 (m, 100H, polymer backbone)

**NMR Shifts of  $(\mathbf{1})\text{CoCl}_2$  in  $\text{D}_2\text{O}$ .** The complex was prepared using an existing procedure.<sup>2</sup>  $^1\text{H}$  NMR ( $\text{D}_2\text{O}$ ):  $\delta = 108.06$  (s, 2H), 84.77 (s, 2H), 51.71 (s, 2H), 34.83 (s, 1H) 15.96 (s,2H). **Note:** Only five proton shifts are observed in the window examined. Since the sixth shift has recently been found to be in the range 130-170 ppm in organic solvents,<sup>3</sup> it is conceivable that the sixth peak populates this region in aqueous solution as well.

### NMR Spectra of $(7)_2\text{Co}^{2+}$ Before and After Oxidation.

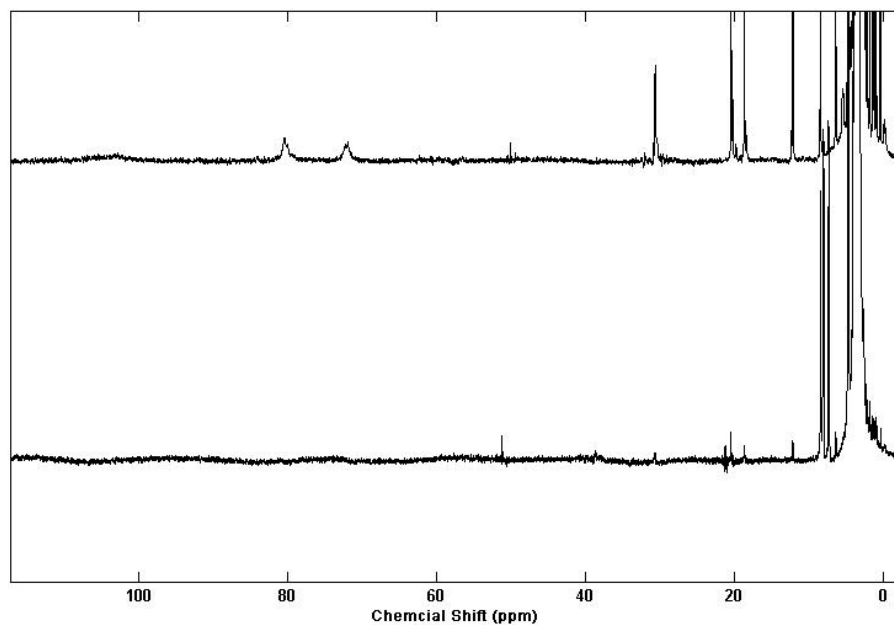

**Figure S1.** A  $^1\text{H}$  NMR spectrum of the paramagnetic  $(7)_2\text{Co}^{2+}$  species (top) shows Knight-shifted peaks between 20 and 90. The sample was gradually oxidized in air to diamagnetic  $(7)_2\text{Co}^{3+}$ , leading to disappearance of the Knight-shifted peaks (bottom).

(1) Mugemana, C.; Guillet, P.; Hoepfener, S.; Schubert, U. S.; Fustin, C.-A.; Gohy, J.-F. *Chemical Communications*, **46**, 1296-1298.

(2) Hogg, R.; Wilkins, R. G. *Journal of the Chemical Society (Resumed)* 1962, 341-350.

(3) Constable, E. C.; Emeléus, H. J. In *Advances in Inorganic Chemistry*; Academic Press: 1986; Vol. **30**, p 69-121.
